# Supplementary material
Source: publisher site journal article supplement (https://www.dovepress.com/article/370004)
Supplement: Supplementary file 1 [file get_supplementary_file.php]

**Supplementary Materials**

Supplementary figures and table are listed as below (legends in small prints):

**Supplementary Figure 1.** Selection of study population


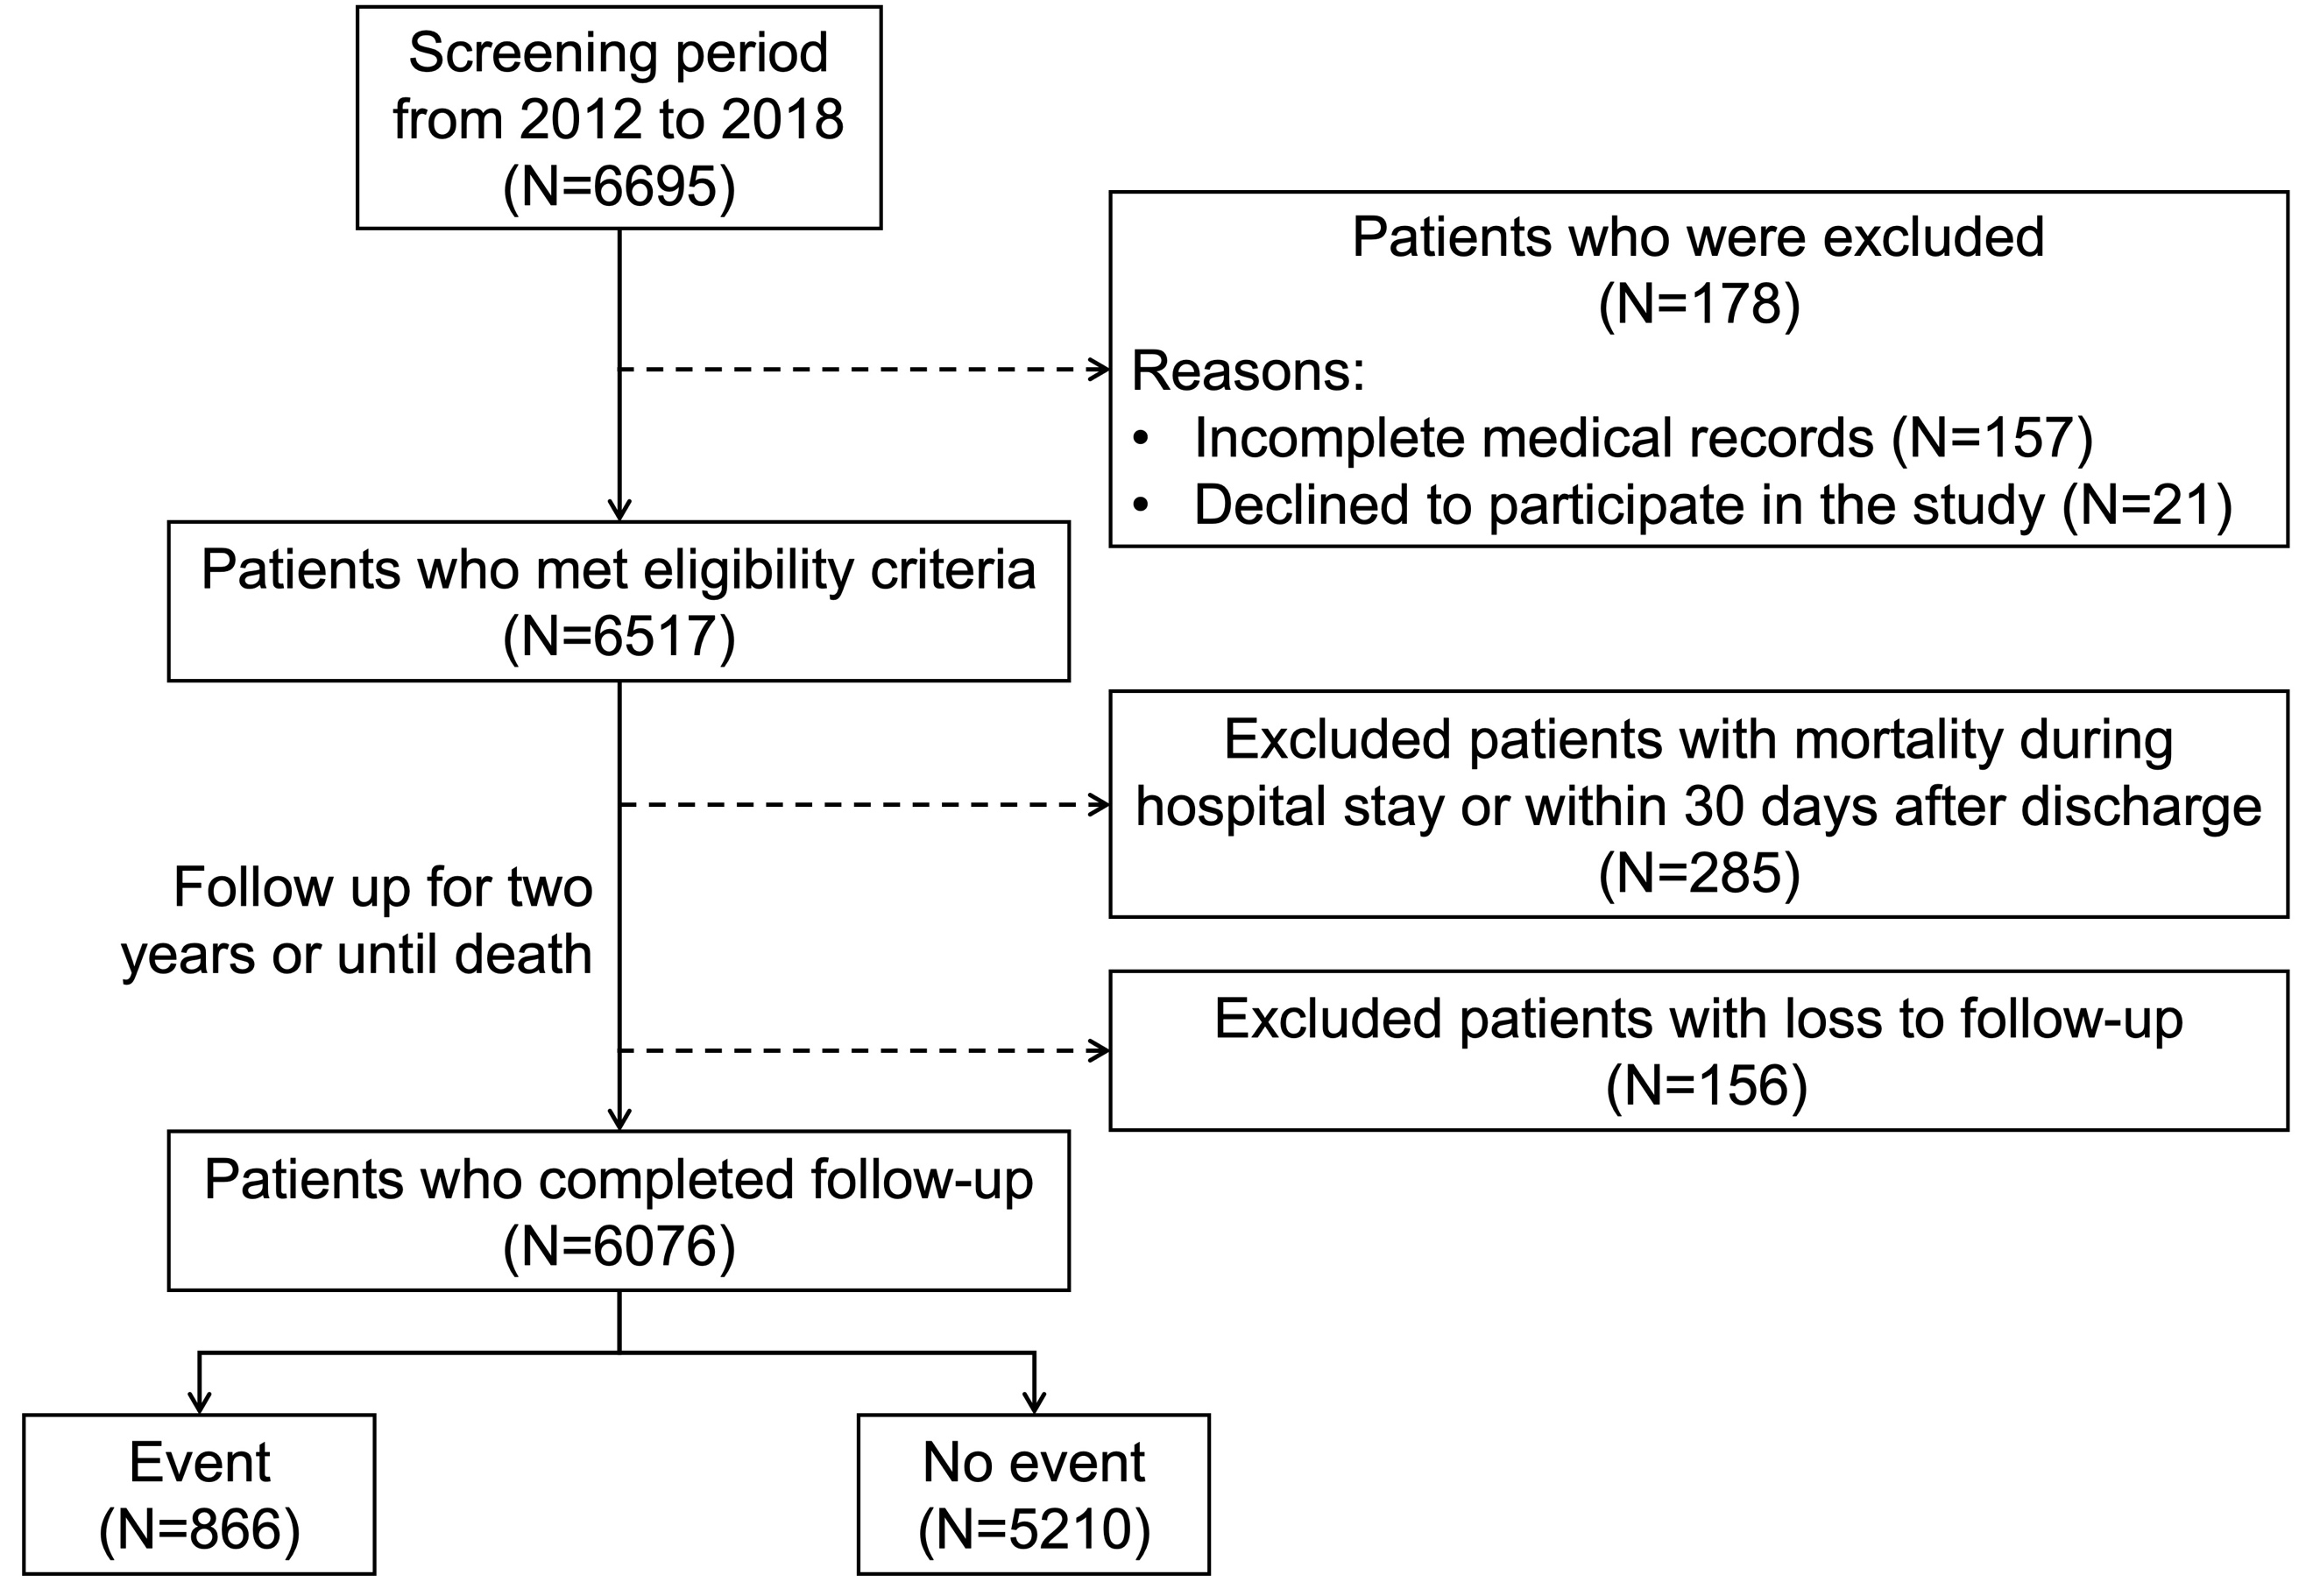


**Supplementary Table 1**. Reference intervals of biomarkers

| Biomarker | Normal values | Unit of measurement |
| --- | --- | --- |
| cTnT | <0.03 | ng/mL |
| WBC | 3.50-9.50 | ×109/L |
| PLT | 125-350 | ×109/L |
| Hb (male) | 120-160 | g/L |
| Hb (female) | 110-150 | g/L |
| APTT | 25.0-31.3 | s |
| PT | 10.0-13.0 | s |
| TT | 14.0-21.0 | s |
| INR | 0.5-1.20 | - |
| FIB | 200-400 | mg/dL |
| D-D | 0-0.80 | mg/dL |
| CK | 26-140 | U/L |
| CK-MB | 0-23 | U/L |
| NT-proBNP | 0-300 | pg/mL |
| hsCRP | 0-3.0 | mg/L |
| HbA1c | 4.0-6.0 | % |
| UA | 155-357 | μmol/L |
| eGFR | - | ml/min-1·1.73m2 |
| sCr | 44-115 | μmol/L |
| ALB | 35-55 | g/L |
| TC, | <5.20 | mmol/L |
| HDL-C | >1.04 | mmol/L |
| LDL-C | <3.40 | mmol/L |

cTnT, cardiac troponin T; WBC, white blood cell count; PLT, platelet count; Hb, hemoglobin; APTT, activated partial thromboplastin time; PT, prothrombin time; TT, thrombin time; INR, international normalized ratio; FIB, fibrinogen; D-D, D-dimer; CK, creatine kinase; NT-proBNP, N-terminal pro-B-type natriuretic peptide; hsCRP, high sensitivity C-reactive protein; HbA1c, hemoglobin A1c; UA, uric acid; eGFR, estimated glomerular filtration rate; sCr, serum creatinine; ALB, albumin; TC, total cholesterol; HDL-C, high-density lipoprotein cholesterol; LDL-C, low-density lipoprotein cholesterol.

**Supplementary Figure 2.** Hazard ratios of primary endpoints with individual biomarker levels


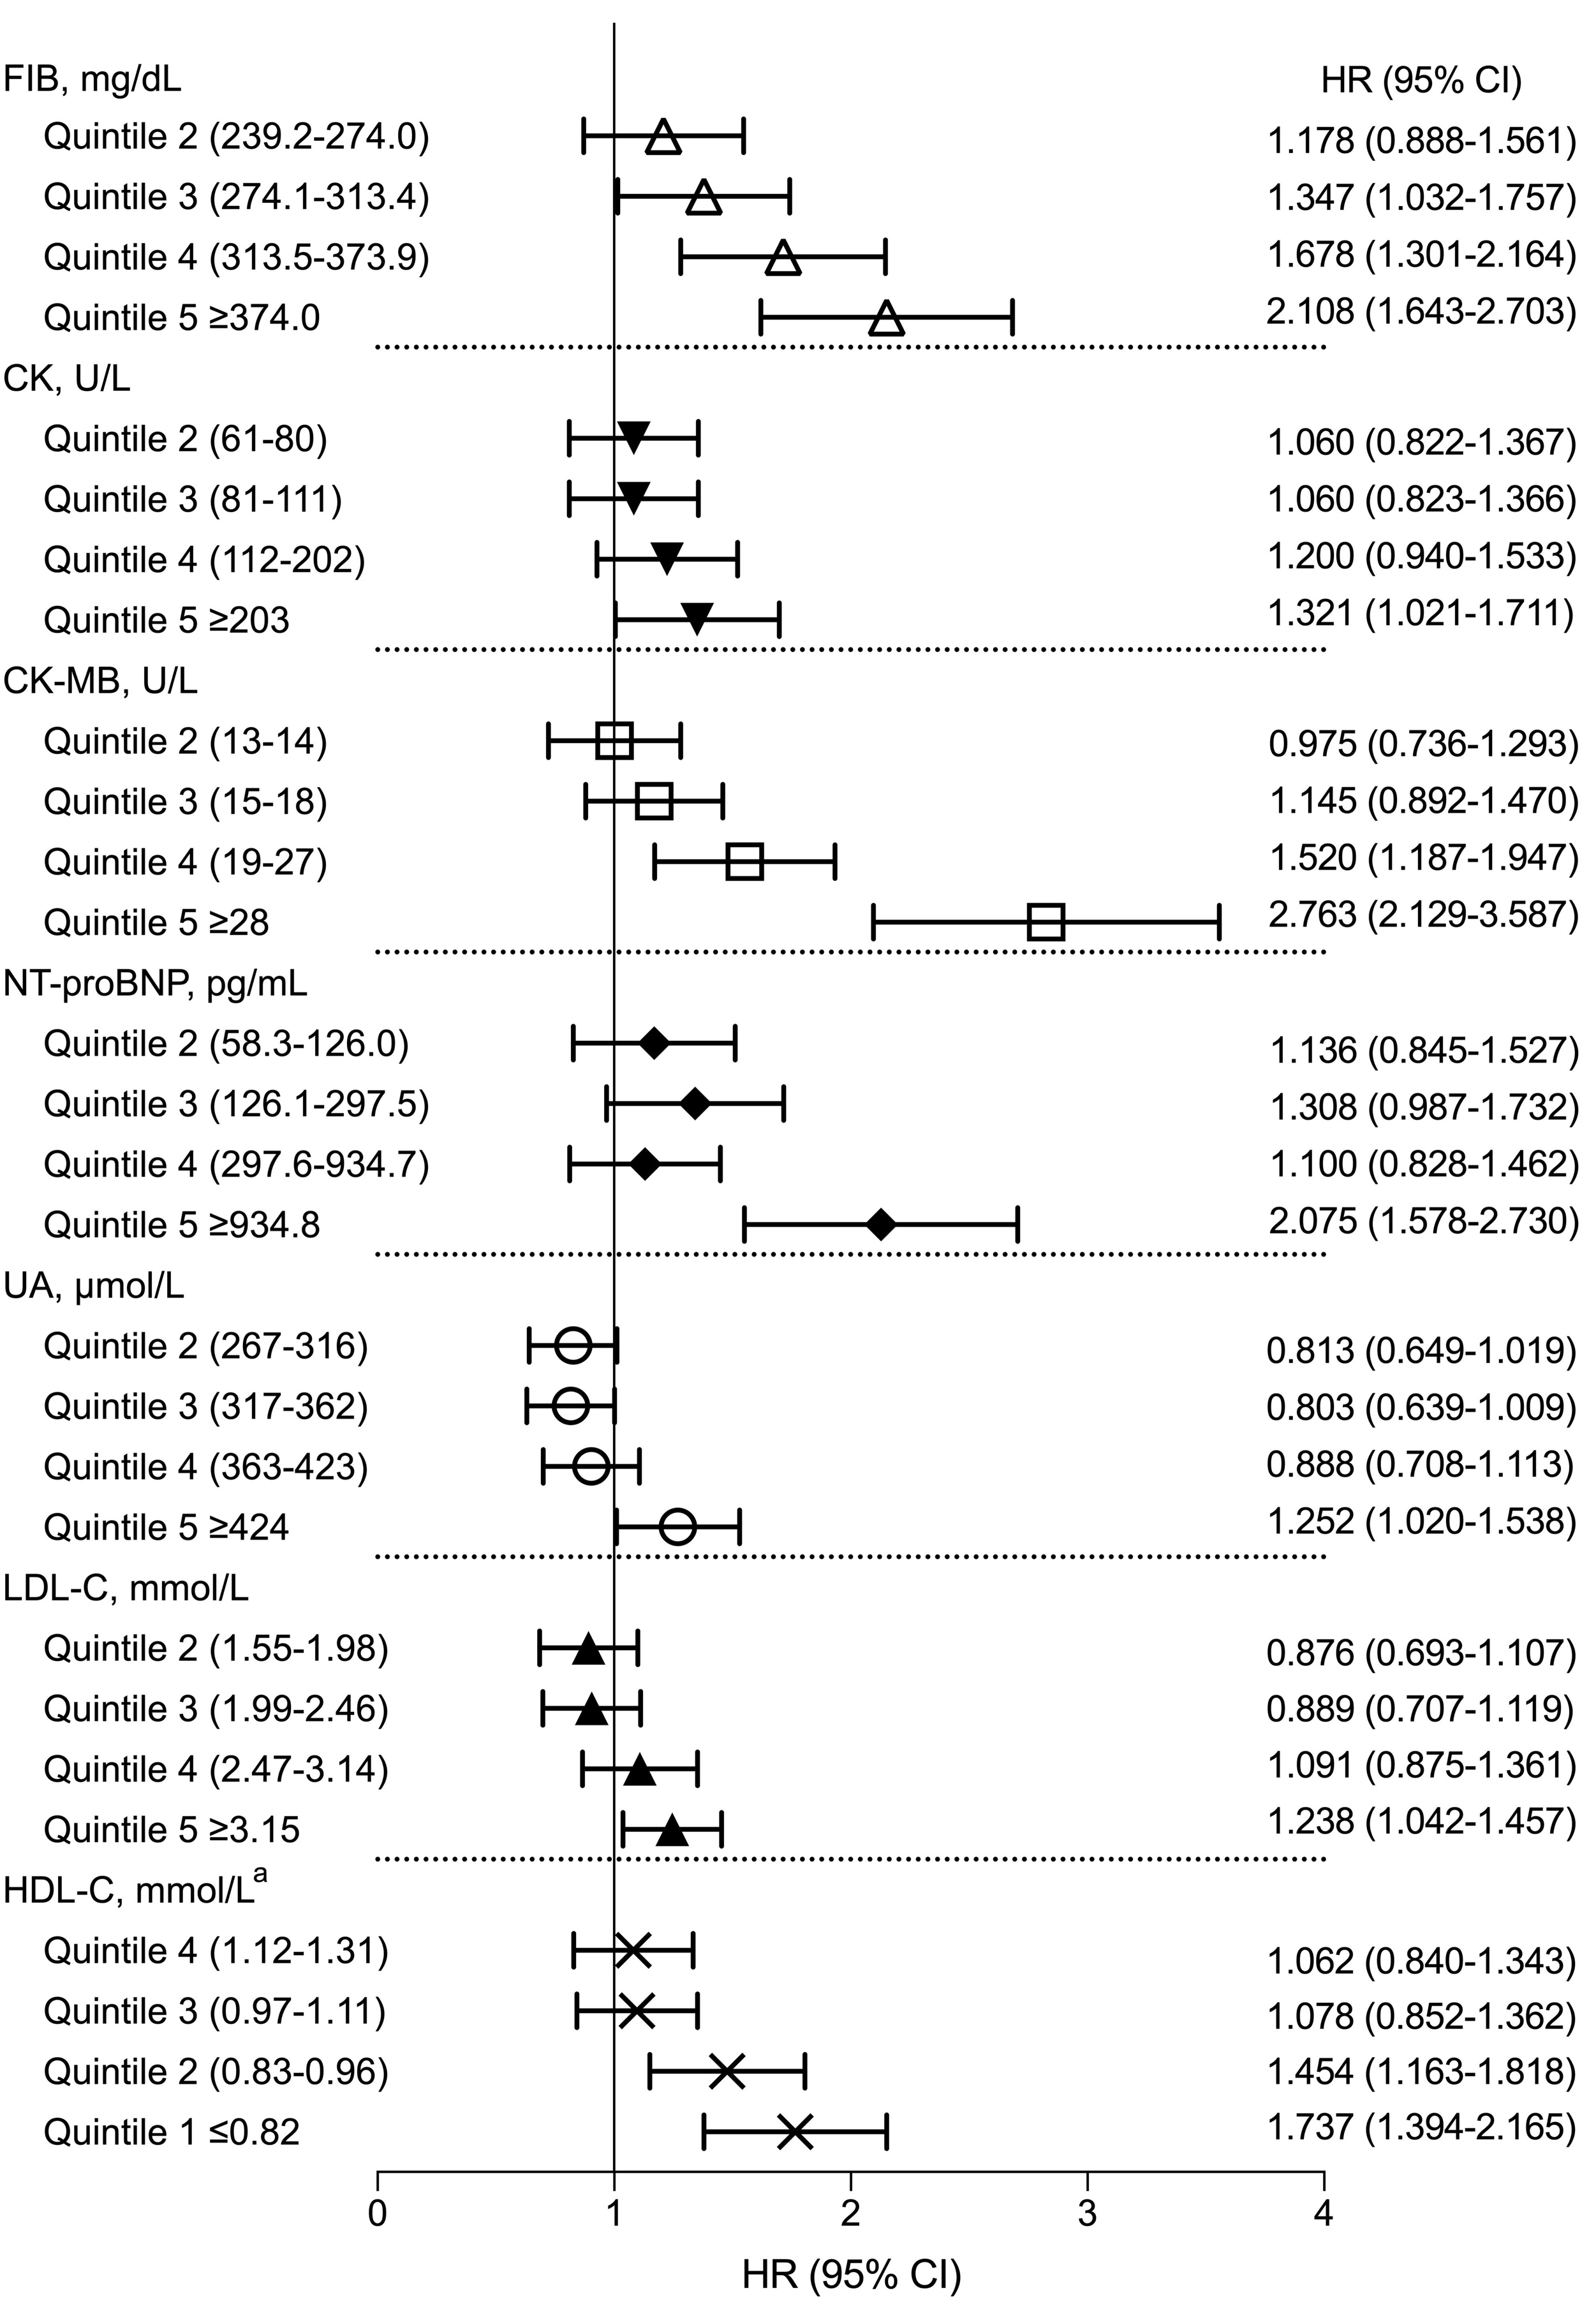


a HR with 95% CI were calculated with reference to the highest concentration of HDL-C (Quintile 5, ≥1.32 mmol/L).

HRs (95% CI) were adjusted by GRACE scores and cTnT. HR, hazard ratio; CI, confidence interval; FIB, fibrinogen; CK, creatine kinase; NT-proBNP, N-terminal pro-B-type natriuretic peptide; UA, uric acid; LDL-C, low-density lipoprotein cholesterol; HDL-C, high-density lipoprotein cholesterol..

**Supplementary Figure 3.** Risk reclassification by biomarker scores


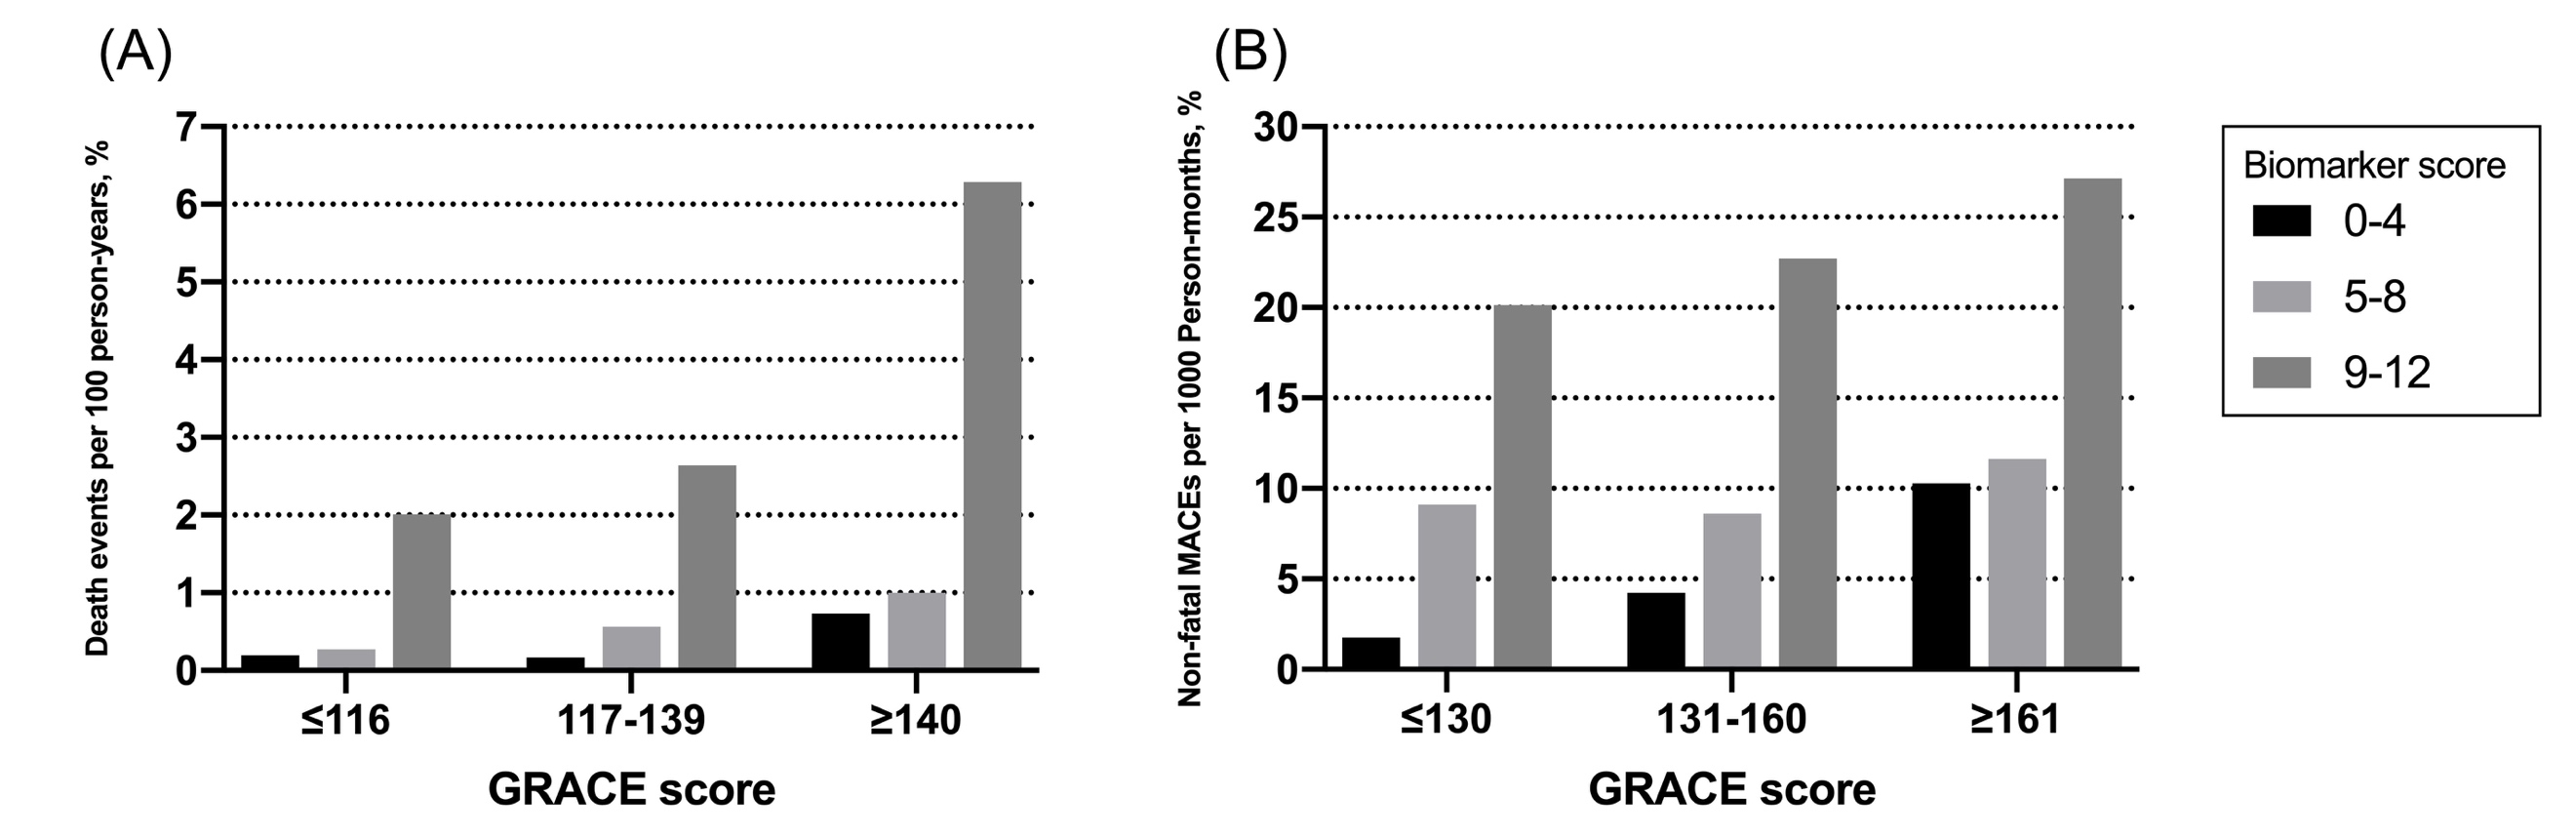


GRACE, Global Registry of Acute Coronary Events .

**Supplementary Figure 4.** Calibration plots of biomarker scores for all-cause death and non-fatal MACEs


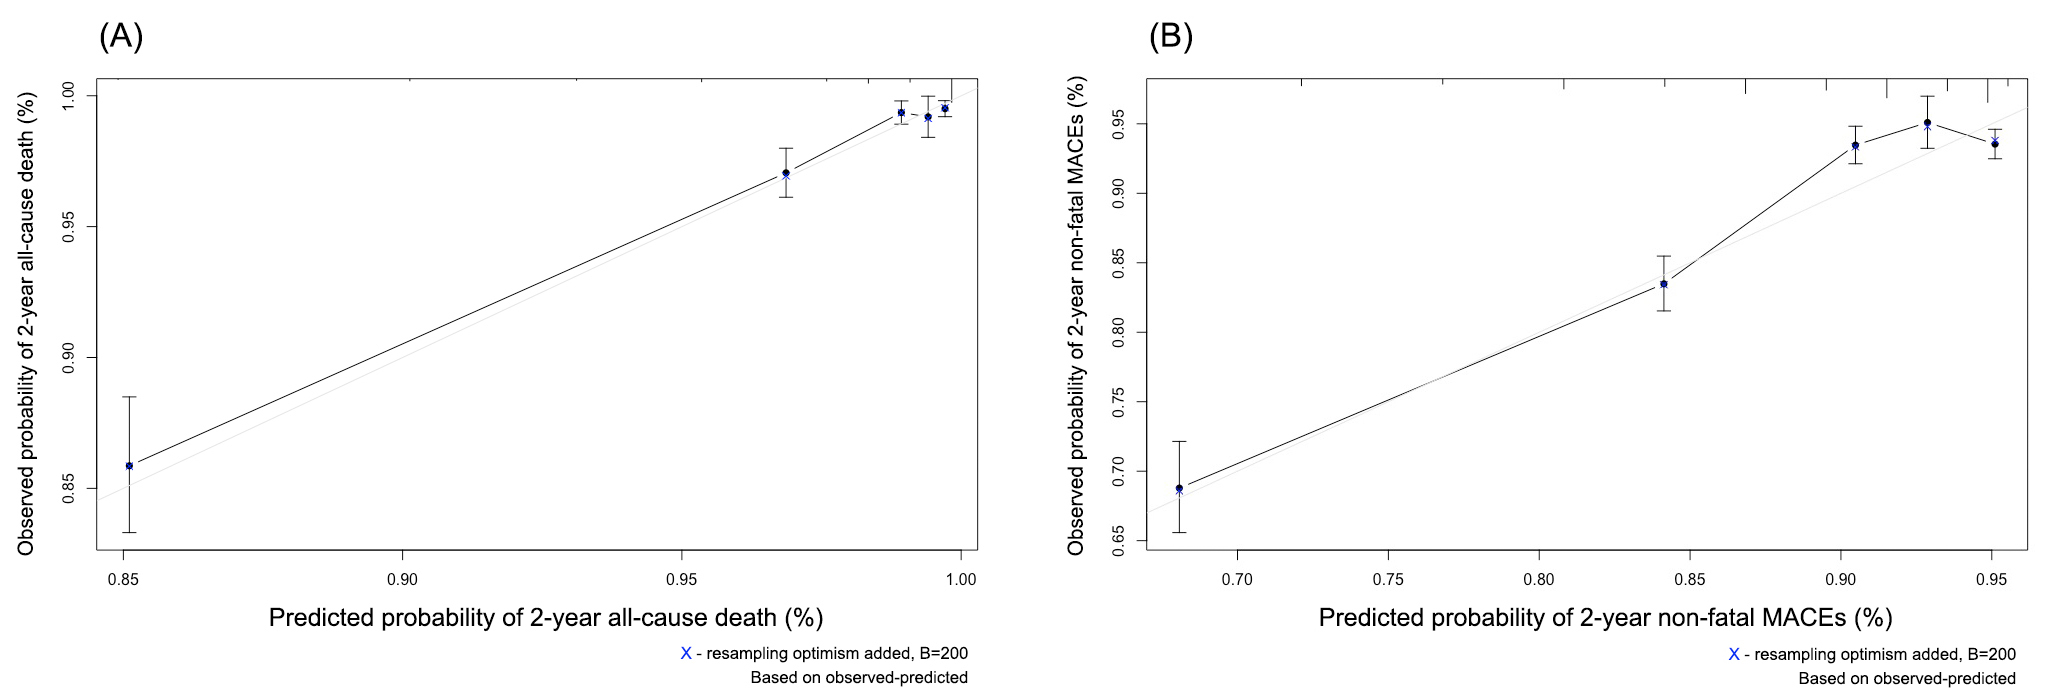


MACE, non-fatal major adverse cardiac events.
